# Supplementary material for: Utilization of partograph and its associated factors among obstetric caregivers in public health institutions of Southwest Ethiopia
Source: BMC Pregnancy Childbirth. 2021 May 27;21:404. doi: 10.1186/s12884-021-03822-5 (PMC8161592; doi:10.1186/s12884-021-03822-5)
Supplement: Supplementary file 1 — Additional file 1. Partograph data set. The data set which was usedto conclude this article [file 12884_2021_3822_MOESM1_ESM.xlsx]

## Sheet: Sheet2
not utilized	poor knowledge	above30	nurse	never married	diploma	above 5	not trained	hospital
not utilized	poor knowledge	above30	nurse	never married	diploma	above 5	trained	hospital
not utilized	poor knowledge	above30	midwifery	never married	diploma	above 5	trained	hospital
not utilized	poor knowledge	above30	midwifery	never married	diploma	above 5	trained	hospital
not utilized	poor knowledge	above30	midwifery	never married	diploma	above 5	trained	hospital
not utilized	poor knowledge	above30	nurse	never married	diploma	above 5	trained	hospital
not utilized	poor knowledge	above30	nurse	never married	diploma	above 5	trained	hospital
not utilized	poor knowledge	above30	nurse	never married	diploma	above 5	trained	hospital
not utilized	poor knowledge	above30	nurse	never married	diploma	above 5	not trained	hospital
not utilized	poor knowledge	above30	nurse	never married	diploma	above 5	not trained	hospital
not utilized	poor knowledge	above30	nurse	never married	diploma	above 5	not trained	hospital
not utilized	poor knowledge	above30	nurse	never married	diploma	above 5	not trained	hospital
not utilized	poor knowledge	above30	nurse	ever married	diploma	below 5	trained	health center
not utilized	poor knowledge	above30	nurse	ever married	diploma	below 5	trained	health center
not utilized	poor knowledge	above30	nurse	ever married	diploma	below 5	trained	health center
not utilized	poor knowledge	above30	nurse	ever married	diploma	below 5	trained	health center
not utilized	poor knowledge	above30	nurse	ever married	diploma	below 5	trained	health center
not utilized	poor knowledge	above30	nurse	ever married	diploma	below 5	trained	health center
not utilized	poor knowledge	above30	nurse	ever married	diploma	below 5	trained	health center
not utilized	poor knowledge	above30	nurse	ever married	diploma	below 5	trained	health center
not utilized	poor knowledge	above30	nurse	ever married	diploma	below 5	trained	health center
not utilized	poor knowledge	above30	nurse	ever married	diploma	below 5	trained	health center
not utilized	poor knowledge	above30	nurse	ever married	diploma	below 5	trained	health center
not utilized	poor knowledge	above30	midwifery	ever married	diploma	below 5	trained	health center
not utilized	good knowlede	above30	midwifery	ever married	diploma	below 5	trained	health center
not utilized	good knowlede	above30	midwifery	ever married	diploma	below 5	trained	health center
not utilized	good knowlede	above30	midwifery	ever married	diploma	below 5	trained	health center
not utilized	good knowlede	above30	midwifery	ever married	diploma	below 5	trained	health center
not utilized	good knowlede	above30	midwifery	ever married	diploma	below 5	trained	health center
not utilized	good knowlede	above30	midwifery	ever married	diploma	below 5	trained	health center
not utilized	good knowlede	above30	midwifery	ever married	diploma	below 5	trained	health center
not utilized	good knowlede	above30	midwifery	ever married	diploma	below 5	trained	health center
not utilized	poor knowledge	above30	midwifery	ever married	diploma	below 5	trained	health center
not utilized	poor knowledge	above30	midwifery	ever married	diploma	below 5	trained	health center
not utilized	poor knowledge	below 30	midwifery	ever married	diploma	below 5	trained	health center
not utilized	poor knowledge	below 30	midwifery	ever married	diploma	below 5	trained	health center
not utilized	poor knowledge	below 30	midwifery	ever married	diploma	below 5	trained	health center
not utilized	poor knowledge	below 30	pho and other	ever married	diploma	below 5	trained	health center
not utilized	poor knowledge	below 30	pho and other	ever married	diploma	below 5	trained	health center
not utilized	poor knowledge	below 30	pho and other	ever married	diploma	below 5	trained	health center
not utilized	poor knowledge	below 30	pho and other	ever married	diploma	below 5	trained	health center
not utilized	poor knowledge	below 30	pho and other	ever married	diploma	below 5	trained	health center
not utilized	poor knowledge	below 30	pho and other	ever married	diploma	below 5	trained	health center
not utilized	poor knowledge	below 30	pho and other	ever married	diploma	below 5	trained	health center
not utilized	poor knowledge	below 30	pho and other	ever married	diploma	below 5	trained	health center
not utilized	poor knowledge	below 30	pho and other	ever married	diploma	below 5	trained	health center
not utilized	poor knowledge	below 30	pho and other	ever married	diploma	below 5	trained	health center
not utilized	poor knowledge	below 30	pho and other	ever married	diploma	below 5	trained	health center
not utilized	poor knowledge	below 30	pho and other	ever married	diploma	below 5	trained	health center
not utilized	poor knowledge	below 30	pho and other	ever married	diploma	below 5	trained	health center
not utilized	poor knowledge	below 30	pho and other	ever married	diploma	below 5	trained	health center
not utilized	poor knowledge	below 30	pho and other	ever married	diploma	below 5	trained	health center
not utilized	poor knowledge	below 30	pho and other	ever married	diploma	below 5	trained	health center
not utilized	poor knowledge	below 30	pho and other	ever married	diploma	below 5	trained	health center
not utilized	poor knowledge	below 30	pho and other	ever married	diploma	below 5	trained	health center
not utilized	poor knowledge	below 30	pho and other	ever married	diploma	below 5	trained	health center
not utilized	poor knowledge	below 30	pho and other	ever married	diploma	below 5	trained	health center
not utilized	poor knowledge	below 30	pho and other	ever married	diploma	below 5	trained	health center
not utilized	poor knowledge	below 30	pho and other	ever married	diploma	below 5	trained	health center
not utilized	good knowlede	below 30	pho and other	never married	degree and above	above 5	trained	hospital
not utilized	good knowlede	below 30	pho and other	never married	degree and above	above 5	trained	hospital
not utilized	good knowlede	below 30	pho and other	never married	degree and above	above 5	trained	hospital
not utilized	good knowlede	below 30	nurse	never married	degree and above	above 5	trained	hospital
not utilized	good knowlede	below 30	nurse	never married	degree and above	above 5	trained	hospital
not utilized	good knowlede	below 30	nurse	never married	degree and above	above 5	trained	health center
not utilized	good knowlede	below 30	nurse	never married	degree and above	above 5	trained	health center
not utilized	good knowlede	below 30	nurse	never married	degree and above	above 5	trained	health center
not utilized	good knowlede	below 30	nurse	never married	degree and above	above 5	trained	health center
not utilized	good knowlede	below 30	nurse	never married	degree and above	above 5	trained	health center
not utilized	good knowlede	below 30	midwifery	never married	degree and above	above 5	trained	health center
not utilized	good knowlede	below 30	midwifery	never married	degree and above	above 5	trained	health center
not utilized	good knowlede	below 30	midwifery	never married	degree and above	above 5	trained	health center
not utilized	good knowlede	below 30	midwifery	never married	degree and above	above 5	trained	health center
not utilized	good knowlede	below 30	midwifery	never married	degree and above	above 5	trained	health center
not utilized	good knowlede	below 30	midwifery	never married	degree and above	above 5	trained	health center
not utilized	good knowlede	below 30	midwifery	never married	degree and above	above 5	trained	health center
not utilized	good knowlede	below 30	nurse	never married	degree and above	above 5	trained	health center
not utilized	good knowlede	below 30	nurse	never married	degree and above	above 5	trained	health center
not utilized	good knowlede	below 30	nurse	never married	degree and above	above 5	trained	health center
not utilized	good knowlede	below 30	nurse	never married	degree and above	above 5	trained	health center
not utilized	good knowlede	below 30	nurse	never married	degree and above	above 5	trained	health center
not utilized	good knowlede	below 30	nurse	never married	degree and above	above 5	trained	health center
not utilized	good knowlede	below 30	nurse	never married	degree and above	above 5	trained	health center
not utilized	good knowlede	below 30	nurse	never married	degree and above	above 5	trained	health center
not utilized	good knowlede	below 30	nurse	never married	degree and above	above 5	trained	health center
not utilized	good knowlede	below 30	nurse	never married	degree and above	above 5	trained	health center
not utilized	good knowlede	below 30	nurse	never married	degree and above	above 5	trained	health center
not utilized	good knowlede	below 30	nurse	never married	degree and above	above 5	trained	health center
not utilized	good knowlede	below 30	nurse	never married	degree and above	above 5	trained	health center
not utilized	good knowlede	below 30	nurse	never married	degree and above	above 5	trained	health center
not utilized	good knowlede	below 30	nurse	never married	degree and above	above 5	trained	health center
not utilized	good knowlede	below 30	nurse	never married	degree and above	above 5	trained	health center
not utilized	good knowlede	below 30	nurse	never married	degree and above	above 5	trained	health center
not utilized	good knowlede	below 30	nurse	never married	degree and above	above 5	trained	health center
not utilized	good knowlede	below 30	nurse	never married	degree and above	above 5	trained	health center
not utilized	good knowlede	below 30	nurse	never married	degree and above	above 5	trained	health center
not utilized	good knowlede	below 30	nurse	never married	degree and above	above 5	trained	health center
not utilized	good knowlede	below 30	nurse	never married	degree and above	above 5	trained	health center
not utilized	good knowlede	below 30	nurse	never married	degree and above	above 5	trained	health center
not utilized	good knowlede	below 30	nurse	never married	degree and above	above 5	trained	health center
not utilized	good knowlede	below 30	nurse	never married	degree and above	above 5	trained	health center
not utilized	good knowlede	below 30	nurse	never married	degree and above	above 5	trained	health center
not utilized	good knowlede	below 30	nurse	never married	degree and above	above 5	trained	health center
not utilized	good knowlede	below 30	nurse	never married	degree and above	above 5	trained	health center
not utilized	good knowlede	below 30	nurse	never married	degree and above	above 5	trained	health center
not utilized	good knowlede	below 30	nurse	never married	degree and above	above 5	trained	health center
not utilized	good knowlede	below 30	nurse	never married	degree and above	above 5	trained	health center
not utilized	good knowlede	below 30	nurse	never married	degree and above	above 5	trained	health center
not utilized	good knowlede	above30	nurse	ever married	degree and above	below 5	trained	hospital
not utilized	good knowlede	above30	nurse	ever married	degree and above	below 5	trained	hospital
not utilized	good knowlede	above30	nurse	ever married	degree and above	below 5	trained	hospital
not utilized	good knowlede	above30	nurse	ever married	degree and above	below 5	trained	hospital
not utilized	good knowlede	above30	nurse	ever married	degree and above	below 5	trained	hospital
not utilized	good knowlede	above30	nurse	ever married	degree and above	below 5	trained	hospital
not utilized	good knowlede	above30	nurse	ever married	degree and above	below 5	trained	hospital
not utilized	good knowlede	above30	nurse	ever married	degree and above	below 5	trained	hospital
not utilized	good knowlede	above30	nurse	ever married	degree and above	below 5	trained	hospital
not utilized	good knowlede	above30	nurse	ever married	degree and above	below 5	trained	hospital
not utilized	good knowlede	above30	nurse	ever married	degree and above	below 5	trained	hospital
not utilized	good knowlede	above30	nurse	ever married	degree and above	below 5	trained	hospital
not utilized	good knowlede	above30	nurse	ever married	degree and above	below 5	trained	hospital
not utilized	good knowlede	above30	nurse	ever married	degree and above	below 5	trained	hospital
not utilized	good knowlede	above30	nurse	ever married	degree and above	below 5	trained	hospital
not utilized	good knowlede	above30	nurse	ever married	degree and above	below 5	trained	hospital
not utilized	good knowlede	above30	nurse	ever married	degree and above	below 5	trained	hospital
not utilized	good knowlede	above30	nurse	ever married	degree and above	below 5	trained	hospital
not utilized	good knowlede	above30	nurse	ever married	degree and above	below 5	trained	hospital
not utilized	good knowlede	above30	nurse	ever married	degree and above	below 5	trained	hospital
not utilized	poor knowledge	below 30	midwifery	ever married	diploma	below 5	not trained	hospital
not utilized	poor knowledge	below 30	midwifery	ever married	diploma	below 5	not trained	hospital
not utilized	poor knowledge	below 30	midwifery	ever married	diploma	below 5	not trained	hospital
not utilized	poor knowledge	below 30	midwifery	ever married	diploma	below 5	not trained	hospital
not utilized	poor knowledge	below 30	midwifery	ever married	diploma	below 5	not trained	hospital
not utilized	poor knowledge	below 30	midwifery	ever married	diploma	below 5	not trained	hospital
not utilized	poor knowledge	below 30	midwifery	ever married	diploma	below 5	not trained	hospital
not utilized	poor knowledge	below 30	midwifery	ever married	diploma	below 5	not trained	hospital
not utilized	poor knowledge	below 30	midwifery	ever married	diploma	below 5	not trained	hospital
not utilized	poor knowledge	below 30	midwifery	ever married	diploma	below 5	not trained	hospital
not utilized	poor knowledge	below 30	midwifery	ever married	diploma	below 5	not trained	hospital
not utilized	poor knowledge	below 30	midwifery	ever married	diploma	below 5	not trained	hospital
not utilized	poor knowledge	below 30	midwifery	ever married	diploma	below 5	not trained	hospital
not utilized	poor knowledge	below 30	midwifery	ever married	diploma	below 5	not trained	hospital
not utilized	poor knowledge	below 30	midwifery	ever married	diploma	below 5	not trained	hospital
not utilized	poor knowledge	below 30	midwifery	ever married	diploma	below 5	not trained	hospital
not utilized	poor knowledge	below 30	midwifery	ever married	diploma	below 5	not trained	hospital
not utilized	poor knowledge	below 30	midwifery	ever married	diploma	below 5	not trained	hospital
not utilized	poor knowledge	below 30	midwifery	ever married	diploma	below 5	not trained	hospital
not utilized	poor knowledge	below 30	midwifery	ever married	diploma	below 5	not trained	hospital
not utilized	poor knowledge	below 30	midwifery	ever married	diploma	below 5	not trained	hospital
not utilized	poor knowledge	below 30	midwifery	ever married	diploma	below 5	not trained	hospital
not utilized	poor knowledge	below 30	midwifery	ever married	diploma	below 5	not trained	hospital
not utilized	poor knowledge	below 30	midwifery	ever married	diploma	below 5	not trained	hospital
not utilized	poor knowledge	below 30	midwifery	ever married	diploma	below 5	not trained	hospital
not utilized	poor knowledge	below 30	midwifery	ever married	diploma	below 5	not trained	hospital
not utilized	poor knowledge	below 30	midwifery	ever married	diploma	below 5	not trained	hospital
not utilized	poor knowledge	below 30	midwifery	ever married	diploma	below 5	not trained	hospital
not utilized	poor knowledge	below 30	midwifery	ever married	diploma	below 5	not trained	hospital
not utilized	poor knowledge	below 30	midwifery	ever married	diploma	below 5	not trained	hospital
not utilized	poor knowledge	below 30	midwifery	ever married	diploma	below 5	not trained	hospital
not utilized	poor knowledge	below 30	midwifery	ever married	diploma	below 5	not trained	hospital
not utilized	poor knowledge	below 30	midwifery	ever married	diploma	below 5	not trained	hospital
not utilized	poor knowledge	below 30	midwifery	ever married	diploma	below 5	not trained	hospital
not utilized	poor knowledge	below 30	midwifery	ever married	diploma	below 5	not trained	hospital
not utilized	poor knowledge	below 30	midwifery	ever married	diploma	below 5	not trained	hospital
not utilized	poor knowledge	below 30	midwifery	ever married	diploma	below 5	not trained	hospital
not utilized	poor knowledge	below 30	midwifery	ever married	diploma	below 5	not trained	hospital
not utilized	poor knowledge	below 30	midwifery	ever married	diploma	below 5	not trained	hospital
not utilized	poor knowledge	below 30	midwifery	ever married	diploma	below 5	not trained	hospital
not utilized	poor knowledge	below 30	midwifery	ever married	diploma	below 5	not trained	hospital
not utilized	poor knowledge	below 30	midwifery	ever married	diploma	below 5	not trained	hospital
not utilized	poor knowledge	below 30	midwifery	ever married	diploma	below 5	not trained	hospital
not utilized	poor knowledge	below 30	midwifery	ever married	diploma	below 5	not trained	hospital
not utilized	poor knowledge	below 30	midwifery	ever married	diploma	below 5	not trained	hospital
not utilized	poor knowledge	below 30	midwifery	ever married	diploma	below 5	not trained	hospital
not utilized	poor knowledge	below 30	midwifery	ever married	diploma	below 5	not trained	hospital
not utilized	poor knowledge	below 30	midwifery	ever married	diploma	below 5	not trained	hospital
not utilized	poor knowledge	below 30	midwifery	ever married	diploma	below 5	not trained	hospital
not utilized	poor knowledge	below 30	midwifery	ever married	diploma	below 5	not trained	hospital
not utilized	poor knowledge	below 30	midwifery	ever married	diploma	below 5	not trained	hospital
not utilized	poor knowledge	below 30	midwifery	ever married	diploma	below 5	not trained	hospital
not utilized	poor knowledge	below 30	midwifery	ever married	diploma	below 5	not trained	hospital
not utilized	poor knowledge	below 30	midwifery	ever married	diploma	below 5	not trained	hospital
not utilized	poor knowledge	below 30	midwifery	ever married	diploma	below 5	not trained	hospital
not utilized	poor knowledge	below 30	midwifery	ever married	diploma	below 5	not trained	hospital
not utilized	poor knowledge	below 30	midwifery	ever married	diploma	below 5	not trained	hospital
not utilized	poor knowledge	below 30	midwifery	ever married	diploma	below 5	not trained	hospital
not utilized	poor knowledge	below 30	midwifery	ever married	diploma	below 5	not trained	hospital
not utilized	poor knowledge	below 30	midwifery	ever married	diploma	below 5	not trained	hospital
not utilized	poor knowledge	below 30	midwifery	ever married	diploma	below 5	not trained	hospital
not utilized	poor knowledge	below 30	midwifery	ever married	diploma	below 5	not trained	hospital
not utilized	poor knowledge	below 30	midwifery	ever married	diploma	below 5	not trained	hospital
not utilized	poor knowledge	below 30	midwifery	ever married	diploma	below 5	not trained	hospital
not utilized	poor knowledge	below 30	midwifery	ever married	diploma	below 5	not trained	hospital
not utilized	poor knowledge	below 30	midwifery	ever married	diploma	below 5	not trained	hospital
not utilized	poor knowledge	below 30	midwifery	ever married	diploma	below 5	not trained	hospital
not utilized	poor knowledge	below 30	midwifery	ever married	diploma	below 5	not trained	hospital
not utilized	poor knowledge	below 30	midwifery	ever married	diploma	below 5	not trained	hospital
not utilized	poor knowledge	below 30	midwifery	ever married	diploma	below 5	not trained	hospital
not utilized	poor knowledge	below 30	midwifery	ever married	diploma	below 5	not trained	hospital
utilized	good knowlede	above30	nurse	never married	diploma	above 5	not trained	hospital
utilized	good knowlede	above30	nurse	never married	diploma	above 5	not trained	hospital
utilized	good knowlede	above30	nurse	never married	diploma	above 5	trained	hospital
utilized	good knowlede	above30	nurse	never married	diploma	above 5	trained	hospital
utilized	good knowlede	above30	nurse	never married	diploma	above 5	trained	hospital
utilized	good knowlede	above30	nurse	never married	diploma	above 5	trained	hospital
utilized	good knowlede	above30	nurse	never married	diploma	above 5	trained	hospital
utilized	good knowlede	above30	nurse	never married	diploma	above 5	trained	hospital
utilized	good knowlede	above30	nurse	never married	diploma	above 5	trained	hospital
utilized	good knowlede	above30	nurse	never married	diploma	above 5	trained	hospital
utilized	good knowlede	above30	nurse	never married	diploma	above 5	trained	hospital
utilized	good knowlede	above30	nurse	never married	diploma	above 5	trained	hospital
utilized	good knowlede	above30	nurse	never married	diploma	above 5	trained	hospital
utilized	good knowlede	above30	nurse	never married	diploma	above 5	trained	hospital
utilized	good knowlede	above30	nurse	never married	diploma	above 5	trained	hospital
utilized	good knowlede	above30	nurse	never married	diploma	above 5	trained	hospital
utilized	good knowlede	above30	nurse	never married	diploma	above 5	trained	hospital
utilized	good knowlede	above30	nurse	never married	diploma	above 5	trained	hospital
utilized	good knowlede	above30	nurse	never married	diploma	above 5	trained	hospital
utilized	good knowlede	above30	nurse	never married	diploma	above 5	trained	hospital
utilized	good knowlede	above30	nurse	never married	diploma	above 5	trained	hospital
utilized	good knowlede	above30	nurse	never married	diploma	above 5	trained	hospital
utilized	good knowlede	below 30	pho and other	never married	diploma	above 5	trained	hospital
utilized	good knowlede	below 30	pho and other	never married	degree and above	above 5	trained	hospital
utilized	good knowlede	below 30	pho and other	never married	degree and above	above 5	trained	hospital
utilized	good knowlede	below 30	pho and other	never married	degree and above	above 5	trained	hospital
utilized	good knowlede	below 30	pho and other	never married	degree and above	above 5	trained	hospital
utilized	good knowlede	below 30	nurse	never married	degree and above	above 5	trained	hospital
utilized	good knowlede	below 30	nurse	never married	degree and above	above 5	trained	hospital
utilized	good knowlede	below 30	nurse	never married	degree and above	above 5	trained	health center
utilized	good knowlede	below 30	nurse	never married	degree and above	above 5	trained	health center
utilized	good knowlede	below 30	nurse	never married	degree and above	above 5	trained	health center
utilized	good knowlede	below 30	nurse	never married	degree and above	above 5	trained	health center
utilized	good knowlede	below 30	nurse	never married	degree and above	above 5	trained	health center
utilized	good knowlede	below 30	nurse	never married	degree and above	above 5	trained	health center
utilized	good knowlede	below 30	nurse	never married	degree and above	above 5	trained	health center
utilized	good knowlede	below 30	nurse	never married	degree and above	above 5	trained	health center
utilized	good knowlede	below 30	nurse	never married	degree and above	above 5	trained	health center
utilized	good knowlede	below 30	nurse	never married	degree and above	above 5	trained	health center
utilized	good knowlede	below 30	nurse	never married	degree and above	above 5	trained	health center
utilized	good knowlede	below 30	pho and other	never married	degree and above	above 5	trained	health center
utilized	good knowlede	below 30	pho and other	never married	degree and above	above 5	trained	health center
utilized	good knowlede	below 30	pho and other	never married	degree and above	above 5	trained	health center
utilized	good knowlede	below 30	pho and other	never married	degree and above	above 5	trained	health center
utilized	good knowlede	below 30	pho and other	never married	degree and above	above 5	trained	health center
utilized	good knowlede	below 30	pho and other	never married	degree and above	above 5	trained	health center
utilized	good knowlede	below 30	pho and other	never married	degree and above	above 5	trained	health center
utilized	good knowlede	below 30	pho and other	never married	degree and above	above 5	trained	health center
utilized	good knowlede	below 30	pho and other	never married	degree and above	above 5	trained	health center
utilized	good knowlede	below 30	pho and other	never married	degree and above	above 5	trained	health center
utilized	good knowlede	below 30	pho and other	never married	degree and above	above 5	trained	health center
utilized	good knowlede	below 30	pho and other	never married	degree and above	above 5	trained	health center
utilized	good knowlede	below 30	pho and other	never married	degree and above	above 5	trained	health center
utilized	good knowlede	below 30	pho and other	never married	degree and above	above 5	trained	health center
utilized	good knowlede	below 30	pho and other	never married	degree and above	above 5	trained	health center
utilized	good knowlede	below 30	pho and other	never married	degree and above	above 5	trained	health center
utilized	good knowlede	below 30	pho and other	never married	degree and above	above 5	trained	health center
utilized	good knowlede	below 30	pho and other	never married	degree and above	above 5	trained	health center
utilized	good knowlede	below 30	pho and other	never married	degree and above	above 5	trained	health center
utilized	good knowlede	below 30	pho and other	never married	degree and above	above 5	trained	health center
utilized	good knowlede	below 30	pho and other	never married	degree and above	above 5	trained	health center
utilized	good knowlede	below 30	pho and other	never married	degree and above	above 5	trained	health center
utilized	good knowlede	below 30	pho and other	never married	degree and above	above 5	trained	health center
utilized	good knowlede	below 30	pho and other	never married	degree and above	above 5	trained	health center
utilized	good knowlede	below 30	pho and other	never married	degree and above	above 5	trained	health center
utilized	good knowlede	below 30	pho and other	never married	degree and above	above 5	trained	health center
utilized	good knowlede	below 30	pho and other	never married	degree and above	above 5	trained	health center
utilized	good knowlede	below 30	pho and other	never married	degree and above	above 5	trained	health center
utilized	good knowlede	below 30	pho and other	never married	degree and above	above 5	trained	health center
utilized	good knowlede	below 30	pho and other	never married	degree and above	above 5	trained	health center
utilized	good knowlede	below 30	pho and other	never married	degree and above	above 5	trained	health center
utilized	good knowlede	below 30	pho and other	never married	degree and above	above 5	trained	health center
utilized	good knowlede	below 30	pho and other	never married	degree and above	above 5	trained	health center
utilized	good knowlede	below 30	pho and other	never married	degree and above	above 5	trained	health center
utilized	good knowlede	below 30	pho and other	never married	degree and above	above 5	trained	health center
utilized	good knowlede	below 30	pho and other	never married	degree and above	above 5	trained	health center
utilized	good knowlede	below 30	pho and other	never married	degree and above	above 5	trained	health center
utilized	good knowlede	below 30	pho and other	never married	degree and above	above 5	trained	health center
utilized	good knowlede	below 30	pho and other	never married	degree and above	above 5	trained	health center
utilized	good knowlede	below 30	pho and other	never married	degree and above	above 5	trained	health center
utilized	good knowlede	below 30	nurse	never married	degree and above	above 5	trained	health center
utilized	good knowlede	below 30	nurse	never married	degree and above	above 5	trained	health center
utilized	good knowlede	below 30	nurse	never married	degree and above	above 5	trained	health center
utilized	good knowlede	below 30	nurse	never married	degree and above	above 5	trained	health center
utilized	good knowlede	below 30	nurse	never married	degree and above	above 5	trained	health center
utilized	good knowlede	below 30	nurse	never married	degree and above	above 5	trained	health center
utilized	good knowlede	below 30	nurse	never married	degree and above	above 5	trained	health center
utilized	good knowlede	below 30	nurse	never married	degree and above	above 5	trained	health center
utilized	good knowlede	below 30	nurse	never married	degree and above	above 5	trained	health center
utilized	poor knowledge	below 30	midwifery	ever married	degree and above	below 5	trained	health center
utilized	poor knowledge	below 30	midwifery	ever married	degree and above	below 5	trained	health center
utilized	poor knowledge	below 30	midwifery	ever married	degree and above	below 5	trained	health center
not utilized	poor knowledge	below 30	midwifery	ever married	degree and above	below 5	trained	health center
not utilized	poor knowledge	below 30	midwifery	ever married	degree and above	below 5	trained	health center
not utilized	poor knowledge	below 30	midwifery	ever married	degree and above	below 5	trained	health center
not utilized	poor knowledge	below 30	midwifery	ever married	degree and above	below 5	trained	health center
not utilized	poor knowledge	below 30	midwifery	ever married	degree and above	below 5	trained	health center
utilized	poor knowledge	below 30	midwifery	ever married	degree and above	below 5	trained	health center
utilized	poor knowledge	below 30	midwifery	ever married	degree and above	below 5	trained	health center
utilized	poor knowledge	below 30	midwifery	ever married	degree and above	below 5	trained	health center
utilized	poor knowledge	below 30	midwifery	ever married	degree and above	below 5	trained	health center
not utilized	poor knowledge	below 30	midwifery	ever married	degree and above	below 5	trained	health center
not utilized	poor knowledge	below 30	midwifery	ever married	degree and above	below 5	trained	health center
not utilized	good knowlede	below 30	midwifery	ever married	degree and above	below 5	trained	health center
utilized	poor knowledge	below 30	midwifery	ever married	degree and above	below 5	trained	health center
utilized	poor knowledge	below 30	midwifery	ever married	degree and above	below 5	trained	health center
utilized	poor knowledge	below 30	midwifery	ever married	degree and above	below 5	trained	health center
not utilized	good knowlede	below 30	midwifery	ever married	degree and above	below 5	trained	health center
not utilized	poor knowledge	below 30	midwifery	ever married	degree and above	below 5	trained	health center
utilized	poor knowledge	below 30	midwifery	ever married	diploma	below 5	not trained	hospital
utilized	poor knowledge	below 30	midwifery	ever married	diploma	below 5	not trained	hospital
utilized	good knowlede	below 30	midwifery	ever married	diploma	below 5	not trained	hospital
utilized	poor knowledge	below 30	midwifery	ever married	diploma	below 5	not trained	hospital
utilized	poor knowledge	below 30	midwifery	ever married	diploma	below 5	not trained	hospital
utilized	good knowlede	below 30	midwifery	ever married	diploma	below 5	not trained	hospital
utilized	poor knowledge	below 30	midwifery	ever married	diploma	below 5	not trained	hospital
utilized	poor knowledge	below 30	midwifery	ever married	diploma	below 5	not trained	hospital
utilized	good knowlede	below 30	midwifery	ever married	diploma	below 5	not trained	hospital
utilized	poor knowledge	below 30	midwifery	ever married	diploma	below 5	not trained	hospital
utilized	poor knowledge	below 30	midwifery	ever married	diploma	below 5	not trained	hospital
not utilized	good knowlede	below 30	midwifery	ever married	diploma	below 5	not trained	hospital
not utilized	poor knowledge	below 30	midwifery	ever married	diploma	below 5	not trained	hospital
utilized	good knowlede	below 30	midwifery	ever married	diploma	below 5	not trained	hospital
utilized	poor knowledge	below 30	midwifery	ever married	diploma	below 5	not trained	hospital
utilized	poor knowledge	below 30	midwifery	ever married	diploma	below 5	not trained	hospital
utilized	good knowlede	below 30	midwifery	ever married	diploma	below 5	not trained	hospital
utilized	good knowlede	below 30	midwifery	ever married	diploma	below 5	not trained	hospital
not utilized	poor knowledge	below 30	midwifery	ever married	diploma	below 5	not trained	hospital
not utilized	good knowlede	below 30	midwifery	ever married	diploma	below 5	not trained	hospital
not utilized	good knowlede	below 30	midwifery	ever married	diploma	below 5	not trained	hospital
not utilized	poor knowledge	below 30	midwifery	ever married	diploma	below 5	not trained	hospital
not utilized	poor knowledge	below 30	midwifery	ever married	diploma	below 5	not trained	hospital
not utilized	poor knowledge	below 30	midwifery	ever married	diploma	below 5	not trained	hospital
not utilized	good knowlede	below 30	midwifery	ever married	diploma	below 5	not trained	hospital
not utilized	poor knowledge	below 30	midwifery	ever married	diploma	below 5	not trained	hospital
not utilized	poor knowledge	below 30	midwifery	ever married	diploma	below 5	not trained	hospital
utilized	poor knowledge	below 30	midwifery	ever married	diploma	below 5	not trained	hospital
utilized	poor knowledge	below 30	midwifery	ever married	diploma	below 5	not trained	hospital
utilized	poor knowledge	below 30	midwifery	ever married	diploma	below 5	not trained	hospital
utilized	poor knowledge	below 30	midwifery	ever married	diploma	below 5	not trained	hospital
utilized	poor knowledge	below 30	midwifery	ever married	diploma	below 5	not trained	hospital
utilized	poor knowledge	below 30	midwifery	ever married	diploma	below 5	not trained	hospital
utilized	poor knowledge	below 30	midwifery	ever married	diploma	below 5	not trained	hospital
utilized	good knowlede	below 30	midwifery	ever married	diploma	below 5	not trained	hospital
utilized	poor knowledge	below 30	midwifery	ever married	diploma	below 5	not trained	hospital
utilized	poor knowledge	below 30	midwifery	ever married	diploma	below 5	not trained	hospital
utilized	poor knowledge	below 30	midwifery	ever married	diploma	below 5	not trained	hospital
utilized	poor knowledge	below 30	midwifery	ever married	diploma	below 5	not trained	hospital
utilized	poor knowledge	below 30	midwifery	ever married	diploma	below 5	not trained	hospital
not utilized	good knowlede	below 30	midwifery	ever married	diploma	below 5	not trained	hospital
not utilized	poor knowledge	below 30	midwifery	ever married	diploma	below 5	not trained	hospital
utilized	poor knowledge	below 30	midwifery	ever married	diploma	below 5	not trained	hospital
utilized	poor knowledge	below 30	midwifery	ever married	diploma	below 5	not trained	hospital
utilized	good knowlede	below 30	midwifery	ever married	diploma	below 5	not trained	hospital
not utilized	poor knowledge	below 30	midwifery	ever married	diploma	below 5	not trained	hospital
not utilized	poor knowledge	below 30	midwifery	ever married	diploma	below 5	not trained	hospital
utilized	poor knowledge	below 30	midwifery	ever married	diploma	below 5	not trained	hospital
utilized	poor knowledge	below 30	midwifery	ever married	diploma	below 5	not trained	hospital
utilized	poor knowledge	below 30	midwifery	ever married	diploma	below 5	not trained	hospital
utilized	poor knowledge	below 30	midwifery	ever married	diploma	below 5	not trained	hospital
utilized	poor knowledge	below 30	midwifery	ever married	diploma	below 5	not trained	hospital
utilized	poor knowledge	below 30	midwifery	ever married	diploma	below 5	not trained	hospital
utilized	poor knowledge	below 30	midwifery	ever married	diploma	below 5	not trained	hospital
utilized	poor knowledge	below 30	midwifery	ever married	diploma	below 5	not trained	hospital
utilized	poor knowledge	below 30	midwifery	ever married	diploma	below 5	not trained	hospital
utilized	poor knowledge	below 30	midwifery	ever married	diploma	below 5	not trained	hospital
utilized	poor knowledge	below 30	midwifery	ever married	diploma	below 5	not trained	hospital
utilized	poor knowledge	below 30	midwifery	ever married	diploma	below 5	not trained	hospital
utilized	poor knowledge	below 30	midwifery	ever married	diploma	below 5	not trained	hospital
utilized	good knowlede	below 30	midwifery	ever married	diploma	below 5	not trained	hospital
utilized	good knowlede	below 30	midwifery	ever married	diploma	below 5	not trained	hospital
utilized	poor knowledge	below 30	midwifery	ever married	diploma	below 5	not trained	hospital
utilized	poor knowledge	below 30	midwifery	ever married	diploma	below 5	not trained	hospital
utilized	poor knowledge	below 30	midwifery	ever married	diploma	below 5	not trained	hospital
utilized	poor knowledge	below 30	midwifery	ever married	diploma	below 5	not trained	hospital
utilized	poor knowledge	below 30	midwifery	ever married	diploma	below 5	not trained	hospital
utilized	poor knowledge	below 30	midwifery	ever married	diploma	below 5	not trained	hospital
utilized	good knowlede	below 30	midwifery	ever married	diploma	below 5	not trained	hospital
utilized	good knowlede	below 30	midwifery	ever married	diploma	below 5	not trained	hospital
utilized	good knowlede	below 30	midwifery	ever married	diploma	below 5	not trained	hospital
utilized	good knowlede	below 30	midwifery	ever married	diploma	below 5	not trained	hospital
utilized	good knowlede	below 30	midwifery	ever married	diploma	below 5	not trained	hospital
utilized	good knowlede	below 30	midwifery	ever married	diploma	below 5	not trained	hospital
utilized	good knowlede	below 30	midwifery	ever married	diploma	below 5	not trained	hospital
utilized	good knowlede	below 30	midwifery	ever married	diploma	below 5	not trained	hospital
utilized	good knowlede	below 30	midwifery	ever married	diploma	below 5	not trained	hospital
utilized	good knowlede	below 30	midwifery	ever married	diploma	below 5	not trained	hospital
utilized	poor knowledge	below 30	midwifery	ever married	diploma	below 5	not trained	hospital
utilized	poor knowledge	below 30	midwifery	ever married	diploma	below 5	not trained	hospital
utilized	poor knowledge	below 30	midwifery	ever married	diploma	below 5	not trained	hospital
utilized	poor knowledge	below 30	midwifery	ever married	diploma	below 5	not trained	hospital
utilized	poor knowledge	below 30	midwifery	ever married	diploma	below 5	not trained	hospital
utilized	poor knowledge	below 30	midwifery	ever married	diploma	below 5	not trained	hospital
utilized	poor knowledge	below 30	midwifery	ever married	diploma	below 5	not trained	hospital
